# Supplementary material
Source: PubMed Central journal article supplement (PMC3996995)
Supplement: Supp_Data.pdf [file Supp_Data.pdf]

## Supplementary Data

### Media Composition

#### *Complete explant medium (CEM)*

Iscove's modified Dulbecco's medium (IMDM; Invitrogen) 79% (v/v)

Fetal bovine serum (FBS; Biosera) 20% (v/v)

Penicillin–streptomycin–glutamine (10,000 U/mL penicillin, 10,000 µg/mL streptomycin, and 29.2 mg/mL L-glutamine in 0.85% saline; Invitrogen) 1% (v/v)

2-mercaptoethanol 0.1 mM (Sigma)

#### *Cardiosphere growth medium (CGM)*

IMDM (Invitrogen) 28% (v/v)

Dulbecco's modified Eagle's medium (DMEM/F-12; Invitrogen) 65% (v/v)

FBS (Biosera) 7% (v/v)

Penicillin–streptomycin–glutamine (as above; Invitrogen) 1% (v/v)

2-Mercaptoethanol 0.1 mM (Sigma)

B27 (Invitrogen) 2% (v/v)

Recombinant human cardiotrophin-1 (Peprotech) 25 ng/mL

Recombinant human epidermal growth factor (Peprotech) 10 ng/mL

Recombinant human fibroblast growth factor, basic (Promega) 20 µg/mL

Thrombin from human plasma (Sigma) 5 U
