# Supplementary material
Source: PubMed Central journal article supplement (PMC3996995)
Supplement: Supp_Table1.pdf [file Supp_Table1.pdf]

SUPPLEMENTARY TABLE S1. LIST OF ANTIBODIES USED FOR FLOW CYTOMETRY AND IMMUNOHISTOCHEMISTRY

| <i>Antibody</i>     | <i>Manufacturer</i>  | <i>Dilution</i>      | <i>Secondary antibody</i>          |
|---------------------|----------------------|----------------------|------------------------------------|
| c-kit-FITC          | BD Pharmingen 553354 | 1:20 (FC) 1:50 (IHC) |                                    |
| Sox 2               | Santa Cruz sc-17320  | 1:50 (IHC)           | AF488 Donkey anti goat (1:1,000)   |
| Oct3/4              | Santa Cruz sc-9081   | 1:50 (IHC)           | AF488 Donkey anti rabbit (1:1,000) |
|                     | Abcam Ab27985        | 1:100 (IHC)          | AF488 Donkey anti goat (1:300)     |
| CD90-FITC           | BD Pharmingen 553012 | 1:100 (FC&IHC)       |                                    |
| Sca-1-PE            | BD Pharmingen 553108 | 1:100 (FC&IHC)       |                                    |
| Cardiac troponin T  | Abcam ab10214        | 1:200 (FC&IHC)       | AF488 Donkey anti mouse (1:1,000)  |
| Myosin heavy chain  | Abcam ab15           | 1:200 (FC&IHC)       | AF488 Donkey anti mouse (1:1,000)  |
| Smooth muscle actin | Sigma A2547          | 1:200 (IHC)          | AF488 Donkey anti mouse (1:1,000)  |
| DDR2                | Santa Cruz sc-7555   | 1:100 (FC)           | AF488 Donkey anti goat (1:200)     |

FC, flow cytometry; IHC, immunohistochemistry.
