# Supplementary material
Source: PubMed Central journal article supplement (PMC3996995)
Supplement: Supp_Table2.pdf [file Supp_Table2.pdf]

SUPPLEMENTARY TABLE S2. LIST OF PRIMERS USED IN QUANTITATIVE REAL-TIME POLYMERASE CHAIN REACTION

| <i>Primer</i> | <i>Gene name</i>                         | <i>Forward primer (5' to 3')</i>              | <i>Reverse primer (5' to 3')</i>                    | <i>Gene accession No.</i>                    | <i>Manufacturer</i> |
|---------------|------------------------------------------|-----------------------------------------------|-----------------------------------------------------|----------------------------------------------|---------------------|
| TERT          | Telomerase reverse transcriptase         | AGTGGTGAACCT<br>CCCTGTGG                      | CAACCGCAAGA<br>CTGACAAGA                            | NM_053423                                    | Eurofins MWG Operon |
| GAPDH         | Glyceraldehyde-3-phosphate dehydrogenase | GGGTGTGAACCA<br>CGAGAAAT                      | ACTGTGGTCAT<br>GAGCCCTTC                            | NM_017008                                    | Sigma               |
| Tel           | Telomere                                 | GGTTTTTGAGGGT<br>GAGGGTGAG<br>GGTGAGGGTGAGGGT | TCCCGACTATC<br>CCTATCC<br>CTATCCCTATCC<br>CTATCCCTA | Sequence from published article <sup>a</sup> | Eurofins MWG Operon |
| 36B4          | Acidic ribosomal phosphoprotein          | ACTGGTCTAGGA<br>CCCGAGAAG                     | TCAATGGTGCCT<br>CTGGAGATT                           | Sequence from published article <sup>b</sup> | Eurofins MWG        |

<sup>a</sup>Cawthon RM. (2002). Telomere measurement by quantitative PCR. *Nucleic Acids Res* 30:e47.

<sup>b</sup>O Callaghan NJ and M Fenech. (2011). A quantitative PCR method for measuring absolute telomere length. *Biol Proced Online*. 13:3.
