# Supplementary material
Source: PubMed Central journal article supplement (PMC3996995)
Supplement: Supp_Table3.pdf [file Supp_Table3.pdf]

SUPPLEMENTARY TABLE S3. IN VIVO MAGNETIC RESONANCE IMAGING MEASUREMENT OF CARDIAC FUNCTION IN 6- AND 18-MONTH-OLD WILD-TYPE AND MDX MICE

|                                 | 6 months  |                       | 18 months |                    |
|---------------------------------|-----------|-----------------------|-----------|--------------------|
|                                 | Wild-type | mdx                   | Wild-type | mdx                |
| <i>N</i>                        | 7         | 7                     | 8         | 8                  |
| Heart rate (bpm)                | 452±9     | 405±27                | 445±20    | 412±24             |
| Body weight (g)                 | 34±1      | 33±1                  | 27±2      | 28±1               |
| Right ventricle                 |           |                       |           |                    |
| End-diastolic volume (μL)       | 60±2      | 67±7                  | 61±8      | 84±8 <sup>a</sup>  |
| End-systolic volume (μL)        | 18±2      | 27±3 <sup>a</sup>     | 27±5      | 44±6 <sup>a</sup>  |
| Stroke volume (μL)              | 42±1      | 40±5                  | 34±2      | 39±4               |
| Ejection fraction (%)           | 70±2      | 60±2 <sup>b</sup>     | 58±3      | 47±2 <sup>a</sup>  |
| Cardiac output (mL/min)         | 19±1      | 16±2                  | 15±1      | 15±1               |
| Left ventricle                  |           |                       |           |                    |
| Mass (mg)                       | 110±9     | 106±6                 | 91±6      | 114±8 <sup>a</sup> |
| End-diastolic volume (μL)       | 67±5      | 63±4                  | 52±3      | 66±6               |
| End-systolic volume (μL)        | 22±3      | 24±3                  | 18±2      | 30±3 <sup>a</sup>  |
| Stroke volume (μL)              | 45±2      | 39±4                  | 34±2      | 36±4               |
| Ejection fraction (%)           | 68±3      | 62±4                  | 66±2      | 55±2 <sup>b</sup>  |
| Cardiac output (mL/min)         | 20±1      | 16±1 <sup>a</sup>     | 15±1      | 14±1               |
| Cardiac index (mL/min×g)        | 0.6±0.02  | 0.5±0.03 <sup>a</sup> | 0.5±0.04  | 0.5±0.04           |
| Mass/body weight ratio (×1,000) | 3.2±0.2   | 3.2±0.2               | 3.4±0.3   | 4.1±0.2            |

Data are presented as mean±SEM.

<sup>a</sup>*P*<0.05 versus wild-type.

<sup>b</sup>*P*<0.01 versus wild-type.
